# Supplementary figures and images for: Static solid-state 14N NMR and computational studies of nitrogen EFG tensors in some crystalline amino acids
Source: Royal Society of Chemistry journal article supplement (doi:10.1039/b906114b), 2009-01-01

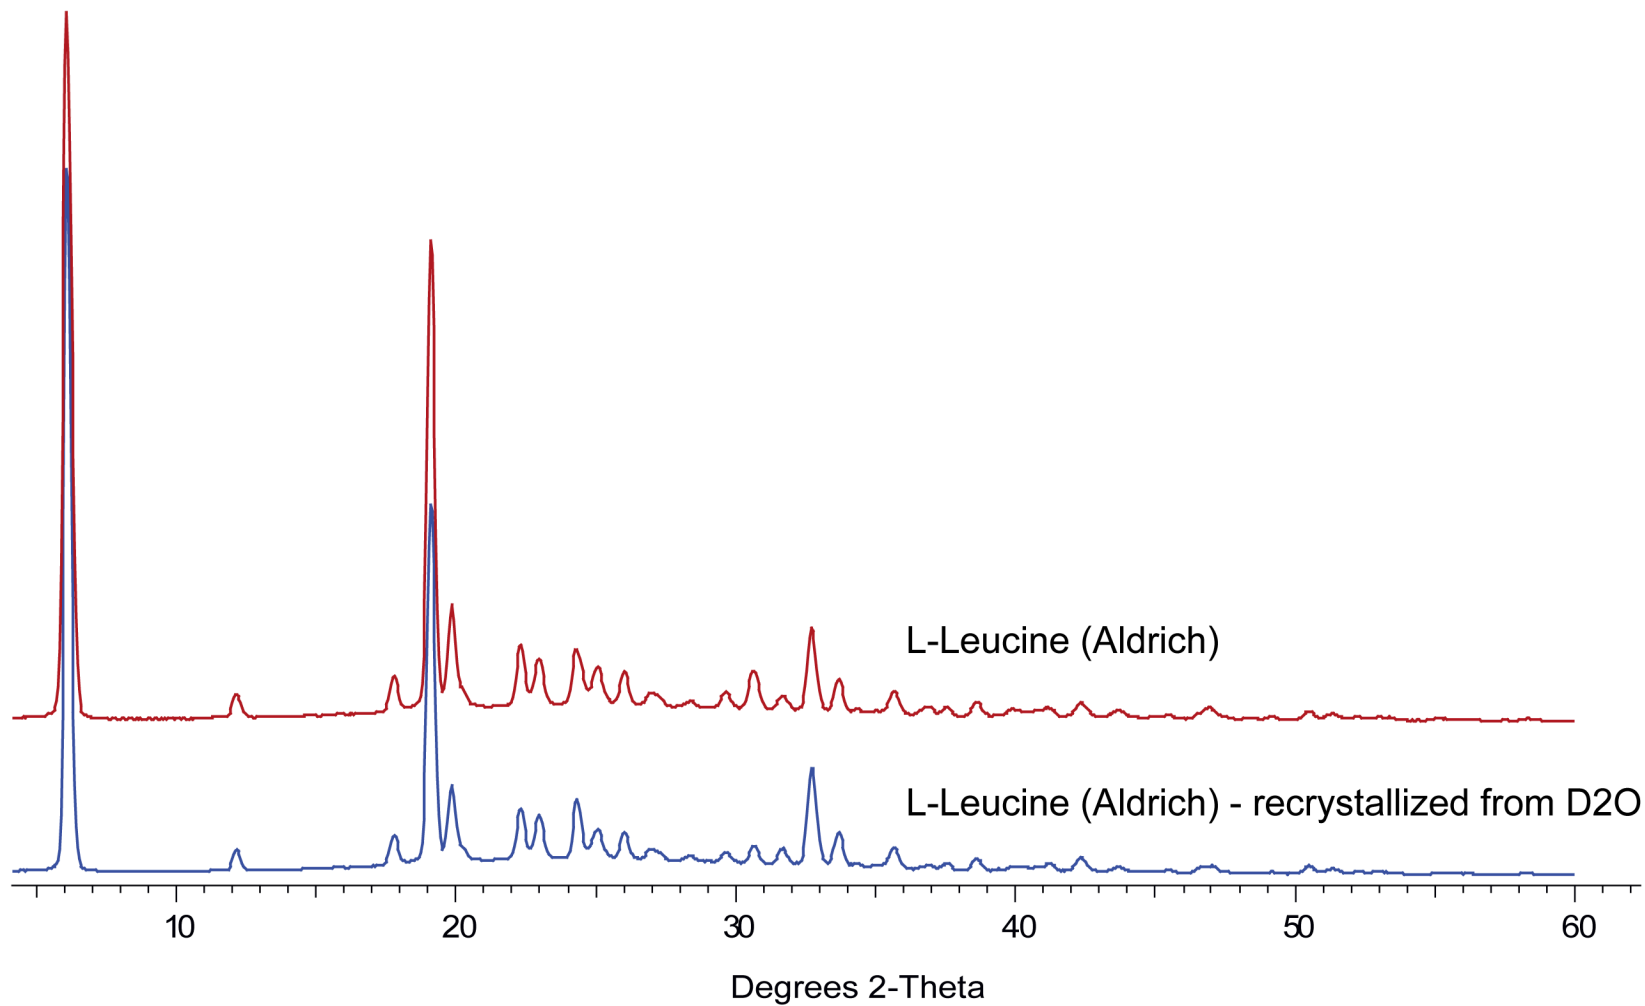

Supplement: b906114b.pdf [file b906114b.pdf]
